# Supplementary material for: Hybrid machine learning for real-time prediction of edema trajectory in large middle cerebral artery stroke
Source: Springer Nature journal article supplement (doi:10.1038/s41746-025-01687-y), 2025-05-17
Supplement: MOESM1 [file 41746_2025_1687_MOESM1_ESM.pdf]

## SUPPLEMENTARY INFORMATION

### 1 Review of Existing Prediction Models

We present five existing models for predicting malignant MCA infarction or malignant brain edema. All of the reviewed models use logistic regression to make static predictions of late-stage patient outcomes, and are therefore limited in their applicability to real-time medical decision-making. The five existing models are summarized in Supplementary Table 1.

### 2 Definitions of Key Extracted Variables

#### 2.1 Stroke Characteristics

*Last seen well* date and times were identified via clinical notes. Last seen well was defined as the last time before a patient experienced a substantial deficit as indicated by the NIHSS (symptoms of numbness, tingling, or other symptoms that would result in NIHSS  $< 3$  were not taken as the time of last seen well). Instances where last seen well lacked exact times or only referenced time were labeled as “inferred.” If last-seen well occurred prior to an in-hospital surgery, the surgery time was identified. If no surgery start time was identified, surgery was assumed to be at 7:00AM. If last seen well referred to “last night before bed,” with no exact time, then last seen well was assumed to be 10:00 PM. All last-seen well data underwent supervisor review (CJO).

*NIHSS* was extracted from history and/or physical exam. In cases where multiple NIHSS were reported, the last one (after any procedures took place) was used. NIHSS scores were documented via clinical notes. For patients who underwent medical or mechanical thrombolytic procedures, we prioritized the NIHSS recorded after intervention.

*Vessel Occlusion location:* All CT Angiograms were reviewed and classified as a vessel occlusion based on radiology reports. The most proximal vessel involved (Internal Carotid Artery, M1, M2, M3/M4) was used for the vessel occlusion location. The anterior cerebral artery was also identified as occluded or not. In instances in which reports described vessel occlusion but did not explicitly name vessel occluded, M1 was assigned if occlusion was described to begin prior to bifurcation/trifurcation.

#### 2.2 Laboratory and Vital Sign Measurements

Laboratory and vital sign values were obtained through the structured Research Patient Data Registry/Clinical Data Warehouse database. The first value present within eight hours before and up to thirty-six hours after presentation date time was used, accounting for labs that occurred prior to the first radiographic scan and/or clinically determined presentation date time. The mean time from presentation to first laboratory value in the derivation cohort was 0.31 hours (approximately 19 minutes), with a standard deviation of 17.9 hours. Laboratory values taken prior to presentation time are due to presentation time definition—labs in the emergency department occasionally predated official “presentation time.” Vital signs at presentation were derived from a chart review of the History and Physical. On average, vital signs data were updated every 51.0 hours (standard deviation 38.9 hours) and laboratory data were updated every 64.1 hours (standard deviation 40.3 hours) within the first week after presentation.

To address clearly erroneous lab or vital sign errors, each longitudinal measurement was assigned a Z-score based on the data distribution across the entire cohort. Measurements with an absolute Z-score of three or greater, or those showing a 25% change from a preceding value, were flagged as a potentially erroneous measurement. The principal investigator reviewed each patient’s flagged laboratory/vital sign trajectories within the context of their hospital course to determine which outliers were valid and which needed to be removed. Temperature values recorded in Celsius (30°s–low 40°s) were converted to Fahrenheit. Other abnormally low-temperature values, such as 78°F, were removed. One sodium value of 102 mEq/L was removed after chart verification. All glucose values  $\geq 1000$  mg/dL and one glucose measurement of 866 mg/dL were removed after chart verification.

#### 2.3 Radiographic Features

The population’s radiographic features were derived using a Natural Language Processing algorithm that screens for patients with acute MCA stroke identified via ICD-9, ICD-10 codes [1]. Patients with large acute MCA stroke were confirmed to be  $\geq 1/2$  of the MCA territory by designated, trained M.D members of the research team (SC, CJO). Images included in  $\geq 1/2$  MCA territory had to have either full superior or inferior MCA division involvement or include sufficient volume (estimate of  $>70$ ccs) of both superior/inferior or deep structures. All indeterminate images underwent secondary review (CJO). A random sampling of our 30 patients using an ABC/2 method [2] demonstrated that median

volume was 122 cc. Below we outline the detailed process we applied to characterize each of the included radiographic features:

- *Stroke size*:  $\geq 1/2$  MCA territory was determined by visual estimate of a trained M.D. and underwent second review. Indeterminate images were reviewed for consensus by three authors.
- *Midline shift* was measured by a trained member of the team using imaging viewer software [Client Outlook, eUnity Diagnostic Viewer, version 6.10.2-489, for MacOs and PACS web viewer] by navigating to the level of the septum pellucidum at the slice of maximum MLS. The reviewer created a line connecting the attachment of falx cerebri anteriorly and the occipital protuberance. Windows were set at W:30 L:30. Distance between the midline and the septum pellucidum both the lateral and medial boundaries was measured by adding a line perpendicular to the midline. MLS used in the analysis was the average distance (mm) from the measurements of the lateral and medial boundaries. A blinded assessment of  $>10\%$  of the data found the mean error was 0.19mm between the MLS reported in the radiographic reports and manual measurements.
- *Pineal gland shift* was measured at the level of the pineal gland, at the slice where the pineal gland shift was at its maximum. A line from the midline to the point of maximum and minimum deviation was taken, and averaged, to best obtain the deviation from the center of the pineal gland. Mean error between MD reviewers was 0.36mm.
- *ASPECTS*, or the Alberta Stroke Programme Early CT Score, divides the brain parenchyma into 10 separate non-overlapping regions, three regions at the level just rostral to the ganglionic structures and four at the level of the thalamus [3]. ASPECTS of 10 implies the brain parenchyma shows no evidence of ischemia, only at the two levels that the predetermined regions are examined. ASPECTS of 0 implies that all the predetermined areas have been affected by ischemia of the brain parenchyma, hypodensity, loss of cortical ribbon, and/or sulcal effacement. ASPECTS were generated using 5mm axial slices and set to variable window widths. The window, as described by Lev et al. [4], for optimal ischemic lesion identification is preferably set to W:30 L:30, or alternatively 40/40. As in Pexman et al. [5], patient positioning was reviewed to determine if the eyes were at the same level in the axial view. If  $>10\%$  of each area had evidence of hypodensity or sulcal effacement, that area was marked as affected by ischemia and one point was deducted from the total score [3]. A review of 10% of scans showed a percent agreement between the two reviewers of 96.4% for dichotomous ASPECTS categories (10-8, 7-0), and 83.9% for high, medium, low ASPECTS (10-8, 7-4, 3-0). Cohen's Kappa was 0.647 for ASPECTS continuously.
- *Hemorrhage* was manually inspected according to ECASS II criteria. Petechial Hemorrhage was determined to be HI1 or HI2, and Parenchymal Hemorrhage PI1 or PI2 [6]. Percent agreement between trained team members (SC, CJO) on a 10% sample was 92.5%.
- *Cerebral atrophy* was recorded based on visual estimation of the ratio of sulcus to gyrus depth on the non-infarcted side and the ratio of the width of the caudate to the brain. A trained researcher evaluated admission non-contrast CT scans to determine the overall level of atrophy in the brain. Atrophy characterizations were categorized into no/mild atrophy (0) and moderate to severe atrophy (1). The percent agreement was 88%.
- *Basal Cistern Effacement* was determined (present/absent) in axial slices at the level of the orbitomeatal line after reviewing consecutive slices for evidence of partial or complete reduction of the basal cisterns space. Images were reviewed for consensus by three authors.

### 3 Missing Data & Frequency of Measurement

The derivation cohort was associated with a higher degree of missing static data compared to the external validation cohort, especially in vital signs at admission and in collateral scores, first MLS value, HbA1c, and osmolality. The number and percentage of patients in both cohorts with missing information regarding the static variables are presented in Supplementary Table 2. Our analysis also showed that vital signs were recorded more frequently at the Boston Medical Center, while laboratory data and radiographic variables were updated more frequently in the Massachusetts General Brigham cohort. These patterns may reflect differences in laboratory and scanning capacity across the two sites. However, we also note that the Massachusetts General Brigham cohort has a high degree of missingness in vital signs data, with fewer than 30% of all hourly observations having an updated vital signs measurement in the preceding 8 hours. This is because longitudinal vital sign data was not as commonly available prior to 2015. Supplementary Table 3 reports the proportion of patient-hour observations in the first week of hospitalization with an updated dynamic variable measurement in the past 8 hours, and Supplementary Table 4 presents the average time between updated measurements of dynamic variables within the first week of hospitalization across cohorts.

## 4 Hospitalization Characteristics Across Cohorts

To further compare the relative severity of mass effect after infarct across sites, we present the breakdown of patients in each cohort by maximum MLS class reached over the course of their hospitalization in Supplementary Table 5. No statistical significance was found between the proportion of patients in each maximum MLS class across the cohorts. We also describe key characteristics of hospitalization (e.g. length of stay, scanning frequency, and maximum MLS measured) for both cohorts with patients separated by MLS class at initial scan in Supplementary Table 6. Notably, the length of time between successive CT scans over the first week of hospitalization is higher (lower scanning frequency) for patients with higher MLS on admission. We also find that patients with higher initial MLS have a higher maximum MLS measurement, as would be expected.

## 5 Machine Learning Model Specification

### 5.1 HELMET Model Features

We report a breakdown of each of the features used in our HELMET models. Supplementary Table 7 describes the features used in the 24-hour prediction model while Supplementary Table 8 describes the features used in the 8-hour prediction model. All date-time features are represented as number of hours after last seen well (e.g. if the patient was last seen well at 12:00 and the first MLS occurred at 18:00, the value of *firstmlsdt\_time\_censored* would be 6). Time censored variables are assigned a place holder value until the time of occurrence to prevent future information from being leaked into the present (e.g. if *firstmlsdt\_time\_censored* was 6, then the first five patient-hour observations would be set to -10).

### 5.2 Comparison of XGBoost to Random Forest Models

We also tested Random Forest (RF) models [7] as part of our initial exploration (prior to adding the large language model-derived features). The Random Forest algorithm is an ensemble algorithm that creates multiple weak learner decision trees [7]. We once again assessed performance on the derivation dataset with five-fold cross-validation. XGBoost and RF achieved roughly equivalent performance, with a mean area under the receiver operating characteristic curve (AUROC) across the four classes of 0.86 ( $\pm 0.017$  for RF,  $\pm 0.0083$  for XGBoost) for predicting 24-hour window maximum MLS, and 0.86 ( $\pm 0.0066$  for RF,  $\pm 0.0059$  for XGBoost) for predicting 8-hour window maximum MLS. The relative similarity in the performance of XGBoost and RF models is consistent with their relatively similar ensemble tree architectures. In both settings, both models significantly outperformed the logistic regression baseline ( $p < 0.001$  on all tests for AUROC and AUPRC).

### 5.3 Final Tuned Hyperparameters

Using a combination of cross-validation within runs and Bayesian updating across successive model training runs, we tuned the model hyperparameters and non-transition observation weights for both the HELMET-8 and HELMET-24 models. The final values for both models are presented in Supplementary Table 10.

### 5.4 Parameter & Structure Sensitivity Analyses

We conducted a number of sensitivity analyses to improve the performance of the model. First, we tested the inclusion of a sample weighting parameter which reduced the relative importance of samples where the target MLS class was the same as the patient’s current MLS class (in order to further prioritize training on the more ambiguous cases of patient class transition). Results showed that a relative importance reduction of 0.4-0.7 yielded increased filtered performance at the expense of some overall, unfiltered performance. Next, we tested adding the class probabilities from the average transition kernel as features and adding the class probabilities as predicted by the linear regression model (discussed below). Neither of these feature additions led to any significant performance improvements. Finally, we tested reducing the feature space by removing the lowest-ranked features from the feature importance values of the initial model. Reducing the feature space to approximately 75 total features yielded increased performance, with further feature reductions being detrimental. However, any attempts at feature reduction proved detrimental after the addition of the large language model class predictions to the feature space.

## 6 Model Performance

### 6.1 Large Language Model Performance

We report the modified AUROC metric for the multi-class classification task as defined in Section 4.7. Using derivation patient radiology reports, the large language model classifiers achieved AUROC scores of 72.23% for the 8-hour task, 67.25% for the 24-hour task, and 91.10% for the 36-hour task when tested on the derivation cohort. Applying the fine-tuned models to the external validation cohort, the large language model performance dropped to 48.04%, 50.13%, and 50.24% on the 8-hour, 24-hour, and 36-hour tasks respectively.

### 6.2 Complete Performance Metrics

In a filtered dataset using only prediction windows in which the patient’s MLS class changed (the “filtered” task), the models result in a mean filtered AUROC of 94.1% (95% CI [92.3%, 96.0%]) for the 24-hour window and 76.2% (95% CI [66.6%, 85.8%]) for the 8-hour window on the derivation dataset. On the external validation dataset, the models result in a mean filtered AUROC of 70.7% (95% CI [61.1%, 80.3%]) for the 24-hour window and 92.1% (95% CI [88.5%, 95.7%]) for the 8-hour window. The filtered performance metrics show that the model performs well both when the patient is expected to remain in the same state and when the edema severity is changing. The complete unfiltered and filtered performance metrics, along with 95% confidence intervals are reported in Supplementary Table 11.

Due to the highly time-dependent nature of edema trajectory, we also calculated average AUROC across various periods of hospitalisation for each patient. These periods were defined based on hours since last seen well as <24 hours, 24-48 hours, 48-96 hours, and  $\geq 96$  hours. AUROC scores for each model across the two tasks and disaggregated by hospitalization period are presented in Supplementary Table 12. Finally, we also present mean AUROC scores disaggregated by patient insurance status in Supplementary Table 13.

### 6.3 Receiver Operating Characteristic Curves and Precision-Recall Curves

The receiver operating characteristic (ROC) curves for both models and both patient cohorts are presented in Supplementary Figure 1. Similarly, the precision-recall curves (PRC) for both models and both cohorts are presented in Supplementary Figure 2.

### 6.4 Shapley Additive Explanation Plots

SHapley Additive exPlanation (SHAP) values are derived from cooperative game theory, originally developed to fairly distribute payouts among players based on their contributions to an overall outcome. In the context of machine learning, SHAP values quantify the contribution of each feature to the prediction by simulating the model’s behavior when each feature is included or excluded from the input data. Specifically, SHAP values represent the average marginal contribution of a feature across all possible combinations of feature subsets, ensuring that the contributions are fairly attributed in a manner consistent with the axioms of efficiency, symmetry, and additivity. SHAP plots indicate the aggregate influence of individual features on assigned classification categories. Each sub-bar’s length indicates the mean SHAP value per class, highlighting the relative strength of a feature’s influence on the prediction class outcome. The features are organized by significance, with the most crucial ones positioned at the top. Supplementary Figure 3 shows SHAP bar plots for the ensemble learning models.

## 7 Model Performance on a Binary Classification Task

An MLS of  $\geq 5$ mm is commonly used in clinical practice as a signal of severe edema [8]. To evaluate the robustness and generalizability of our methodology, we evaluated the HELMET framework on a simplified binary classification task. This experiment benchmarks the HELMET models against the baseline EDEMA regression models in a more conventional target. This set of models focus on estimating whether the maximum MLS within the prediction window would exceed the 5mm threshold.

The resulting binary classification models were constructed following the HELMET framework, using the same multimodal input features and model architecture described in the Section 4 of the main manuscript. The only change was to the outcome definition: instead of predicting four discrete MLS classes, the models were trained to classify whether future MLS would be below or above the 5mm threshold. Corresponding EDEMA baseline models were also retrained for the binary task using the same respective inputs. Performance metrics for both model families—across derivation and external validation cohorts, 8-hour and 24-hour horizons, and both overall and filtered datasets—are reported in Supplementary Table 14.



Across both prediction horizons and cohorts, the HELMET models consistently achieved higher or comparable AUROC, AUPRC, and accuracy values compared to the EDEMA baselines. The overall AUROC scores for the binary task ranged from 88.4–91.0% for HELMET models, compared to 63.5–87.0% for the EDEMA baseline models. Improvements were especially notable in the external validation cohort, where the HELMET models demonstrated high predictive performance with lower variance, indicating improved generalizability. Additionally, performance on the filtered subsets—observations where MLS class transitioned across the threshold—was markedly better for HELMET models, suggesting superior sensitivity to clinically relevant changes.

The primary HELMET-8 and HELMET-24 models were based on more granular, four-class MLS targets (0mm, 0–3mm, 3–8mm, >8mm) to reflect a more nuanced progression of edema severity over time. The success of the HELMET framework on the simpler binary task provides additional evidence regarding the robustness and adaptability across a spectrum of prediction problems. The wider performance improvement over baseline observed in the main analysis of the multiclass prediction problem as compared with the smaller difference in overall performance observed for this binary prediction problem highlights the power of existing regression models for simpler problems and underscores the usefulness of our hybrid ensemble learning approach for more granular prediction.

## 8 Reporting Checklist

We followed the updated Transparent Reporting of Multivariable Prediction Models for Individual Prognosis or Diagnosis (TRIPOD+AI) guidelines in the reporting of our study [9]. The completed TRIPOD+AI checklist can be found in Figure 4.

## References for Supplementary Information

1. Ong, C. J. *et al.* Machine learning and natural language processing methods to identify ischemic stroke, acuity and location from radiology reports. *PloS one* **15**, e0234908 (2020).
2. Sims, J. R. *et al.* ABC/2 for rapid clinical estimate of infarct, perfusion, and mismatch volumes. *Neurology* **72**, 2104–2110 (2009).
3. Barber, P. A., Demchuk, A. M., Zhang, J. & Buchan, A. M. Validity and reliability of a quantitative computed tomography score in predicting outcome of hyperacute stroke before thrombolytic therapy. *The Lancet* **355**, 1670–1674 (2000).
4. Lev, M. H. *et al.* Acute stroke: improved nonenhanced CT detection—benefits of soft-copy interpretation by using variable window width and center level settings. *Radiology* **213**, 150–155 (1999).
5. Pexman, J. W. *et al.* Use of the Alberta Stroke Program Early CT Score (ASPECTS) for assessing CT scans in patients with acute stroke. *American Journal of Neuroradiology* **22**, 1534–1542 (2001).
6. Hacke, W. *et al.* Randomised double-blind placebo-controlled trial of thrombolytic therapy with intravenous alteplase in acute ischaemic stroke (ECASS II). *The Lancet* **352**, 1245–1251 (1998).
7. Breiman, L. Random forests. *Machine Learning* **45**, 5–32 (2001).
8. Wijdicks, E. F. *et al.* Recommendations for the management of cerebral and cerebellar infarction with swelling: a statement for healthcare professionals from the American Heart Association/American Stroke Association. *Stroke* **45**, 1222–1238 (2014).
9. Collins, G. S. *et al.* TRIPOD+AI statement: updated guidance for reporting clinical prediction models that use regression or machine learning methods. *BMJ* **385**. eprint: <https://www.bmj.com/content/385/bmj-2023-078378.full.pdf>. <https://www.bmj.com/content/385/bmj-2023-078378> (2024).
10. Shimoyama, T. *et al.* The DASH score: a simple score to assess risk for development of malignant middle cerebral artery infarction. *Journal of the neurological sciences* **338**, 102–106 (2014).
11. Ong, C. J., Gluckstein, J., Laurido-Soto, O., *et al.* Enhanced Detection of Edema in Malignant Anterior Circulation Stroke (EDEMA) Score: A Risk Prediction Tool. *Stroke* **48**, 1969–1972 (2017).
12. Cheng, Y. *et al.* External validation and modification of the EDEMA score for predicting malignant brain edema after acute ischemic stroke. *Neurocritical care* **32**, 104–112 (2020).
13. Wu, S. *et al.* Predicting the emergence of malignant brain oedema in acute ischaemic stroke: a prospective multicentre study with development and validation of predictive modelling. *Eclinicalmedicine* **59** (2023).
14. Tang, A. *et al.* External validation and comparison of MBE, EDEMA, and modified EDEMA scores for predicting malignant cerebral EDEMA in Chinese patients with large hemisphere infarction patients without revascularization. *Journal of Clinical Neuroscience* **122**, 66–72 (2024).

## Supplementary Figures

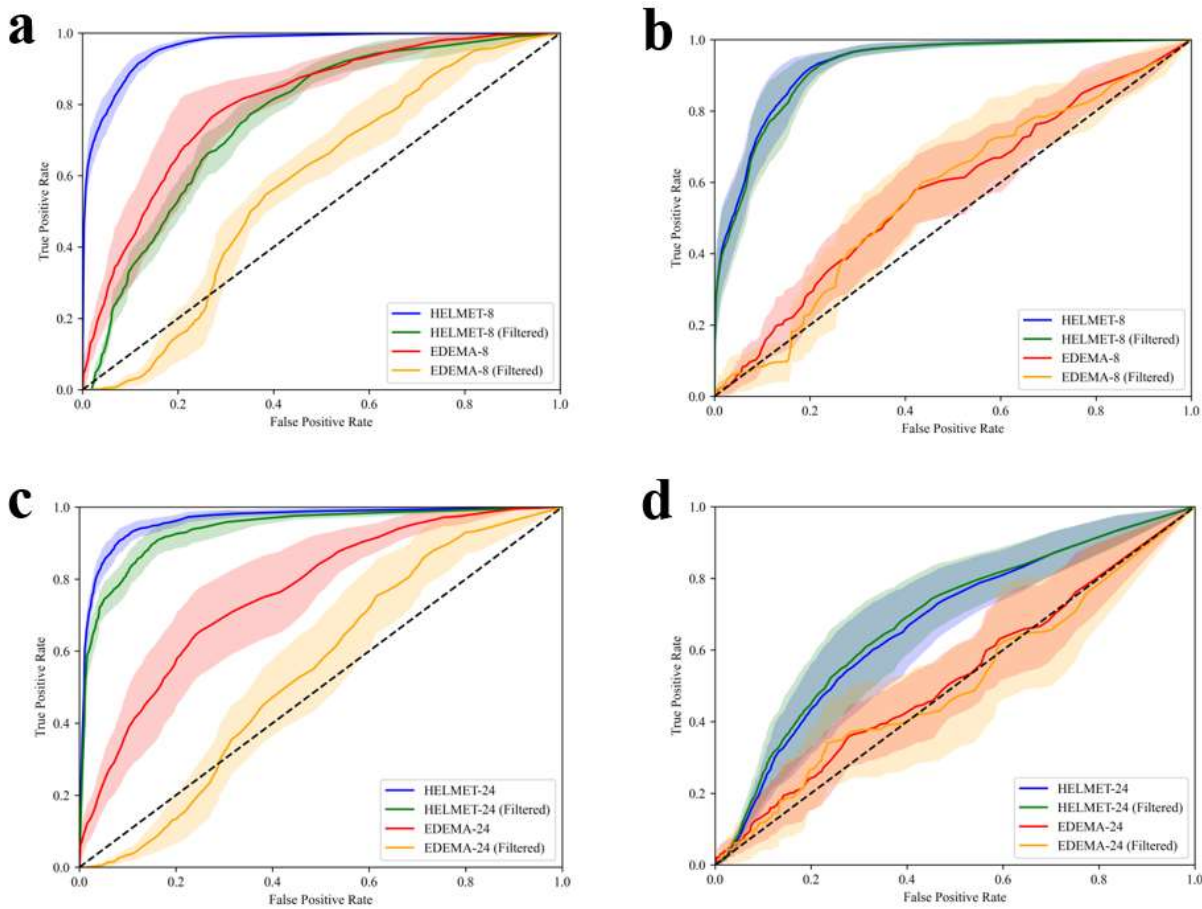

Supplementary Figure 1: **Receiver Operating Characteristic Curves.** Receiver operating characteristic curves for HELMET models compared to baseline EDEMA Score models for overall and filtered datasets for both derivation and external validation cohorts. Blue lines show performance of the HELMET models on the overall dataset, Orange lines show performance of the HELMET models on the filtered (MLS transition) observations. Red and orange lines show performance of the baseline EDEMA Score models on the overall and filtered datasets, respectively. a) Performance on the derivation dataset for the 8-hour prediction task; b) performance on external validation dataset for the 8-hour prediction task; c) derivation cohort performance for 24-hour task; d) external validation cohort performance for 24-hour task

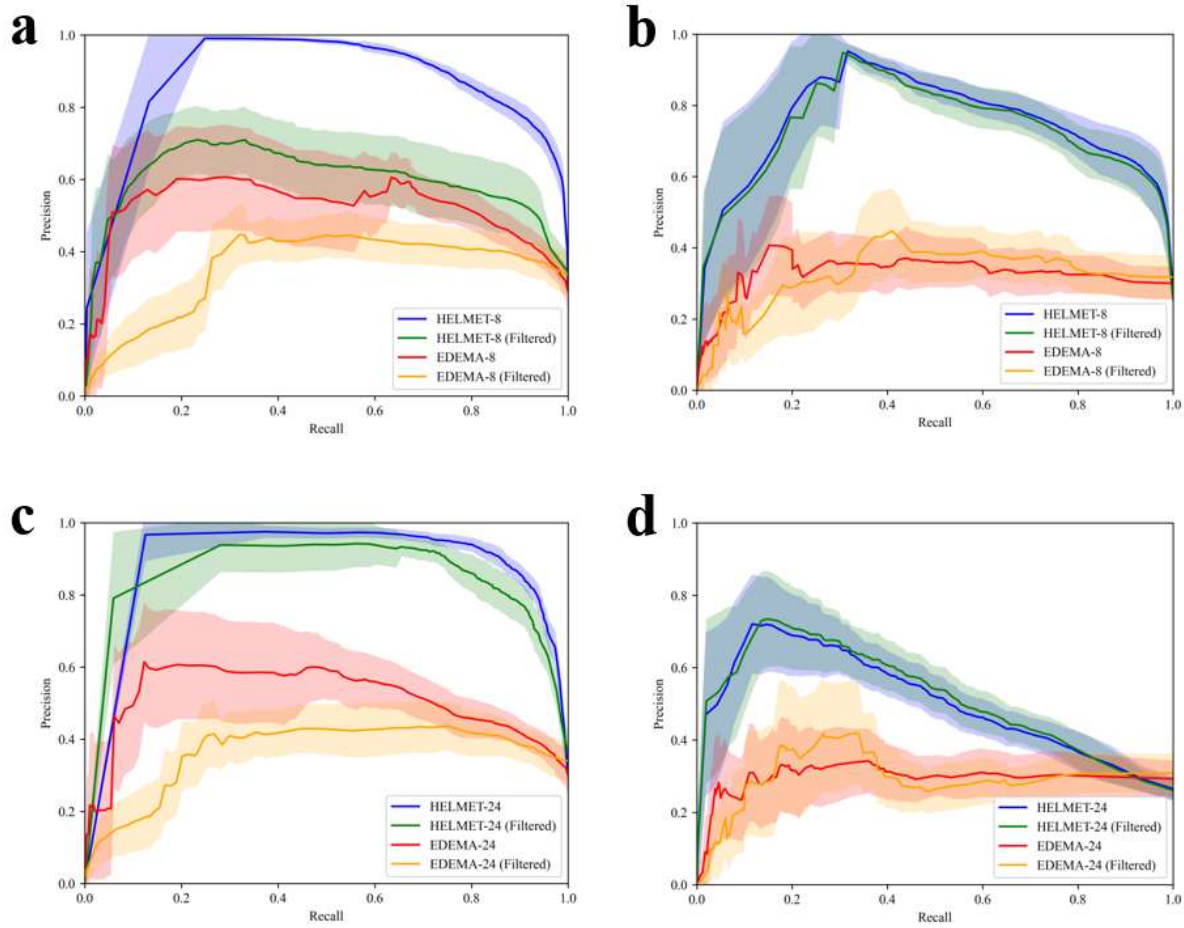

Supplementary Figure 2: **Precision Recall Curves.** Precision recall curves for HELMET models compared to baseline EDEMA Score models for overall and filtered datasets for both derivation and external validation cohorts. Blue lines show performance of the HELMET models on the overall dataset, Orange lines show performance of the HELMET models on the filtered (MLS transition) observations. Red and orange lines show performance of the baseline EDEMA Score models on the overall and filtered datasets, respectively. a) Performance on the derivation dataset for the 8-hour prediction task; b) performance on external validation dataset for the 8-hour prediction task; c) derivation cohort performance for 24-hour task; d) external validation cohort performance for 24-hour task

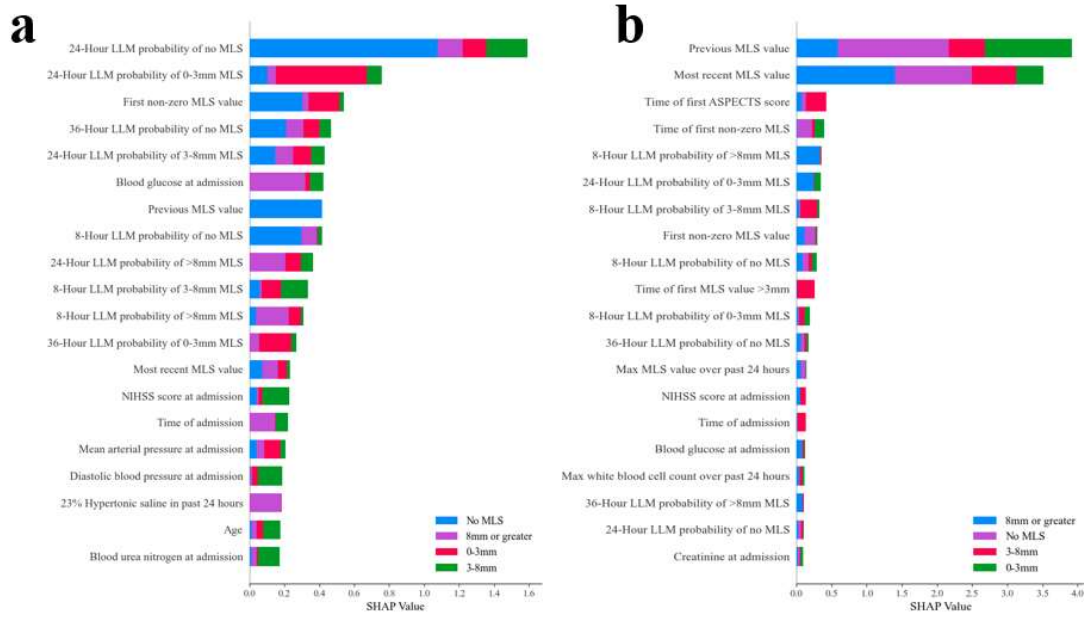

Supplementary Figure 3: **SHAP Plots.** The 20 features with the highest SHapley Additive exPlanation (SHAP) values for the ensemble learning models. Colors represent the contribution of each feature to positive predictions of each MLS class. a) Highest-ranked features for HELMET-24; b) Highest-ranked features for HELMET-8.

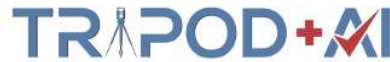

Version: 11-January-2024

| Section/Topic       | Item | Development / evaluation <sup>1</sup> | Checklist item                                                                                                                                                                                                                               | Reported on page |
|---------------------|------|---------------------------------------|----------------------------------------------------------------------------------------------------------------------------------------------------------------------------------------------------------------------------------------------|------------------|
| <b>TITLE</b>        |      |                                       |                                                                                                                                                                                                                                              |                  |
| Title               | 1    | D,E                                   | Identify the study as developing or evaluating the performance of a multivariable prediction model, the target population, and the outcome to be predicted                                                                                   | 1                |
| <b>ABSTRACT</b>     |      |                                       |                                                                                                                                                                                                                                              |                  |
| Abstract            | 2    | D,E                                   | See TRIPOD+AI for Abstracts checklist                                                                                                                                                                                                        |                  |
| <b>INTRODUCTION</b> |      |                                       |                                                                                                                                                                                                                                              |                  |
| Background          | 3a   | D,E                                   | Explain the healthcare context (including whether diagnostic or prognostic) and rationale for developing or evaluating the prediction model, including references to existing models                                                         | 2                |
|                     | 3b   | D,E                                   | Describe the target population and the intended purpose of the prediction model in the context of the care pathway, including its intended users (e.g., healthcare professionals, patients, public)                                          | 2-3              |
|                     | 3c   | D,E                                   | Describe any known health inequalities between sociodemographic groups                                                                                                                                                                       | 3                |
| Objectives          | 4    | D,E                                   | Specify the study objectives, including whether the study describes the development or validation of a prediction model (or both)                                                                                                            | 3                |
| <b>METHODS</b>      |      |                                       |                                                                                                                                                                                                                                              |                  |
| Data                | 5a   | D,E                                   | Describe the sources of data separately for the development and evaluation datasets (e.g., randomised trial, cohort, routine care or registry data), the rationale for using these data, and representativeness of the data                  | 8                |
|                     | 5b   | D,E                                   | Specify the dates of the collected participant data, including start and end of participant accrual; and, if applicable, end of follow-up                                                                                                    | 8                |
| Participants        | 6a   | D,E                                   | Specify key elements of the study setting (e.g., primary care, secondary care, general population)                                                                                                                                           | 8                |
|                     | 6b   | D,E                                   | Describe the eligibility criteria for study participants                                                                                                                                                                                     | 8 + Fig 1        |
|                     | 6c   | D,E                                   | Give details of any treatments received, and how they were handled during model development or evaluation, if relevant                                                                                                                       | 9                |
| Data preparation    | 7    | D,E                                   | Describe any data pre-processing and quality checking, including whether this was similar across relevant sociodemographic groups                                                                                                            | 9-10             |
| Outcome             | 8a   | D,E                                   | Clearly define the outcome that is being predicted and the time horizon, including how and when assessed, the rationale for choosing this outcome, and whether the method of outcome assessment is consistent across sociodemographic groups | 9                |
|                     | 8b   | D,E                                   | If outcome assessment requires subjective interpretation, describe the qualifications and demographic characteristics of the outcome assessors                                                                                               | 9-10             |
|                     | 8c   | D,E                                   | Report any actions to blind assessment of the outcome to be predicted                                                                                                                                                                        | NA               |
| Predictors          | 9a   | D                                     | Describe the choice of initial predictors (e.g., literature, previous models, all available predictors) and any pre-selection of predictors before model building                                                                            | 11               |
|                     | 9b   | D,E                                   | Clearly define all predictors, including how and when they were measured (and any actions to blind assessment of predictors for the outcome and other predictors)                                                                            | 9-10             |
|                     | 9c   | D,E                                   | If predictor measurement requires subjective interpretation, describe the qualifications and demographic characteristics of the predictor assessors                                                                                          | 9-10             |
| Sample size         | 10   | D,E                                   | Explain how the study size was arrived at (separately for development and evaluation), and justify that the study size was sufficient to answer the research question. Include details of any sample size calculations                       | 8                |
| Missing data        | 11   | D,E                                   | Describe how missing data were handled. Provide reasons for omitting any data                                                                                                                                                                | 9                |
| Analytical methods  | 12a  | D                                     | Describe how the data were used (e.g., for development and evaluation of model performance) in the analysis, including whether the data were partitioned, considering any sample size requirements                                           | 10               |
|                     | 12b  | D                                     | Depending on the type of model, describe how predictors were handled in the analyses (functional form, rescaling, transformation, or any standardisation)                                                                                    | 9-10             |
|                     | 12c  | D                                     | Specify the type of model, rationale <sup>2</sup> , all model-building steps, including any hyperparameter tuning, and method for internal validation                                                                                        | 10-11            |
|                     | 12d  | D,E                                   | Describe if and how any heterogeneity in estimates of model parameter values and model performance was handled and quantified across clusters (e.g., hospitals, countries). See TRIPOD-Cluster for additional considerations <sup>3</sup>    | NA               |
|                     | 12e  | D,E                                   | Specify all measures and plots used (and their rationale) to evaluate model performance (e.g., discrimination, calibration, clinical utility) and, if relevant, to compare multiple models                                                   | 11-12            |
|                     | 12f  | E                                     | Describe any model updating (e.g., recalibration) arising from the model evaluation, either overall or for particular sociodemographic groups or settings                                                                                    | NA               |
|                     | 12g  | E                                     | For model evaluation, describe how the model predictions were calculated (e.g., formula, code, object, application programming interface)                                                                                                    | 11               |
| Class imbalance     | 13   | D,E                                   | If class imbalance methods were used, state why and how this was done, and any subsequent methods to recalibrate the model or the model predictions                                                                                          | NA               |
| Fairness            | 14   | D,E                                   | Describe any approaches that were used to address model fairness and their rationale                                                                                                                                                         | NA               |
| Model output        | 15   | D                                     | Specify the output of the prediction model (e.g., probabilities, classification). Provide details and rationale for any classification and how the thresholds were identified                                                                | 9, 11            |

<sup>1</sup> D=items relevant only to the development of a prediction model; E=items relating solely to the evaluation of a prediction model; D,E=items applicable to both the development and evaluation of a prediction model

<sup>2</sup> Separately for all model building approaches.

<sup>3</sup> TRIPOD-Cluster is a checklist of reporting recommendations for studies developing or validating models that explicitly account for clustering or explore heterogeneity in model performance (eg, at different hospitals or centres). Debray et al, BMJ 2023; 380: e071018 [DOI: 10.1136/bmj-2022-071018]





Version: 11-January-2024

|                                                              |     |     |                                                                                                                                                                                                                                                                                                                                                    |             |
|--------------------------------------------------------------|-----|-----|----------------------------------------------------------------------------------------------------------------------------------------------------------------------------------------------------------------------------------------------------------------------------------------------------------------------------------------------------|-------------|
| <i>Training versus evaluation</i>                            | 16  | D,E | Identify any differences between the development and evaluation data in healthcare setting, eligibility criteria, outcome, and predictors                                                                                                                                                                                                          | NA          |
| <i>Ethical approval</i>                                      | 17  | D,E | Name the institutional research board or ethics committee that approved the study and describe the participant-informed consent or the ethics committee waiver of informed consent                                                                                                                                                                 | 8           |
| <b>OPEN SCIENCE</b>                                          |     |     |                                                                                                                                                                                                                                                                                                                                                    |             |
| <i>Funding</i>                                               | 18a | D,E | Give the source of funding and the role of the funders for the present study                                                                                                                                                                                                                                                                       | 12          |
| <i>Conflicts of interest</i>                                 | 18b | D,E | Declare any conflicts of interest and financial disclosures for all authors                                                                                                                                                                                                                                                                        | 13          |
| <i>Protocol</i>                                              | 18c | D,E | Indicate where the study protocol can be accessed or state that a protocol was not prepared                                                                                                                                                                                                                                                        | NA          |
| <i>Registration</i>                                          | 18d | D,E | Provide registration information for the study, including register name and registration number, or state that the study was not registered                                                                                                                                                                                                        | NA          |
| <i>Data sharing</i>                                          | 18e | D,E | Provide details of the availability of the study data                                                                                                                                                                                                                                                                                              | 12          |
| <i>Code sharing</i>                                          | 18f | D,E | Provide details of the availability of the analytical code <sup>4</sup>                                                                                                                                                                                                                                                                            | 12          |
| <b>PATIENT &amp; PUBLIC INVOLVEMENT</b>                      |     |     |                                                                                                                                                                                                                                                                                                                                                    |             |
| <i>Patient &amp; Public Involvement</i>                      | 19  | D,E | Provide details of any patient and public involvement during the design, conduct, reporting, interpretation, or dissemination of the study or state no involvement                                                                                                                                                                                 | NA          |
| <b>RESULTS</b>                                               |     |     |                                                                                                                                                                                                                                                                                                                                                    |             |
| <i>Participants</i>                                          | 20a | D,E | Describe the flow of participants through the study, including the number of participants with and without the outcome and, if applicable, a summary of the follow-up time. A diagram may be helpful.                                                                                                                                              | 3 + Fig 1   |
|                                                              | 20b | D,E | Report the characteristics overall and, where applicable, for each data source or setting, including the key dates, key predictors (including demographics), treatments received, sample size, number of outcome events, follow-up time, and amount of missing data. A table may be helpful. Report any differences across key demographic groups. | 3 + Tab 1   |
|                                                              | 20c | E   | For model evaluation, show a comparison with the development data of the distribution of important predictors (demographics, predictors, and outcome).                                                                                                                                                                                             | 4-5 + Fig 4 |
| <i>Model development</i>                                     | 21  | D,E | Specify the number of participants and outcome events in each analysis (e.g., for model development, hyperparameter tuning, model evaluation)                                                                                                                                                                                                      | 3           |
| <i>Model specification</i>                                   | 22  | D   | Provide details of the full prediction model (e.g., formula, code, object, application programming interface) to allow predictions in new individuals and to enable third-party evaluation and implementation, including any restrictions to access or re-use (e.g., freely available, proprietary) <sup>5</sup>                                   | 12          |
| <i>Model performance</i>                                     | 23a | D,E | Report model performance estimates with confidence intervals, including for any key subgroups (e.g., sociodemographic). Consider plots to aid presentation.                                                                                                                                                                                        | 4 + Fig 3   |
|                                                              | 23b | D,E | If examined, report results of any heterogeneity in model performance across clusters. See TRIPOD Cluster for additional details <sup>5</sup> .                                                                                                                                                                                                    | NA          |
| <i>Model updating</i>                                        | 24  | E   | Report the results from any model updating, including the updated model and subsequent performance                                                                                                                                                                                                                                                 | NA          |
| <b>DISCUSSION</b>                                            |     |     |                                                                                                                                                                                                                                                                                                                                                    |             |
| <i>Interpretation</i>                                        | 25  | D,E | Give an overall interpretation of the main results, including issues of fairness in the context of the objectives and previous studies                                                                                                                                                                                                             | 5-6         |
| <i>Limitations</i>                                           | 26  | D,E | Discuss any limitations of the study (such as a non-representative sample, sample size, overfitting, missing data) and their effects on any biases, statistical uncertainty, and generalizability                                                                                                                                                  | 7           |
| <i>Usability of the model in the context of current care</i> | 27a | D   | Describe how poor quality or unavailable input data (e.g., predictor values) should be assessed and handled when implementing the prediction model                                                                                                                                                                                                 | 6-7         |
|                                                              | 27b | D   | Specify whether users will be required to interact in the handling of the input data or use of the model, and what level of expertise is required of users                                                                                                                                                                                         | 6-7         |
|                                                              | 27c | D,E | Discuss any next steps for future research, with a specific view to applicability and generalizability of the model                                                                                                                                                                                                                                | 5-7         |

From: Collins GS, Moons KGM, Dhiman P, et al. *BMJ* 2024;385:e078378. doi:10.1136/bmj-2023-078378

<sup>4</sup> This relates to the analysis code, for example, any data cleaning, feature engineering, model building, evaluation.  
<sup>5</sup> This relates to the code to implement the model to get estimates of risk for a new individual.

Supplementary Figure 4: **TRIPOD+AI Reporting Checklist**. Completed reporting guidelines checklist. Reporting follows the updated Transparent Reporting of a multivariable prediction model for Individual Prognosis Or Diagnosis guidelines (TRIPOD+AI).

## Supplementary Tables

Supplementary Table 1: **Prior Literature.** A summary of existing research on predicting events relating to cerebral edema.

| Study                       | Sample Size | Type                | Prediction Target        | AUROC | Dynamic Prediction? | Single Center? | Retrospective? | Other Limitations                                                                     |
|-----------------------------|-------------|---------------------|--------------------------|-------|---------------------|----------------|----------------|---------------------------------------------------------------------------------------|
| Shimoyama et al., 2014 [10] | 119         | Logistic Regression | Malignant MCA infarction | 0.88  | No                  | Yes            | Yes            | Small sample biased towards an elderly population (average age 78.0)                  |
| Ong et al., 2017 [11]       | 222         | Logistic Regression | Malignant brain edema    | 0.75  | No                  | Yes            | Yes            | Late outcome prediction and only data from first 24 hours.                            |
| Cheng et al., 2020 [12]     | 487         | Logistic Regression | Malignant brain edema    | 0.8   | No                  | Yes            | Yes            | Same as Ong, et al., 2017. Also shows low generalizability without model re-training. |
| Wu et al., 2023 [13]        | 1627        | Logistic Regression | Malignant brain edema    | 0.9   | No                  | Yes            | Yes            | No imaging features used in the model.                                                |
| Tang et al., 2024 [14]      | 314         | Logistic Regression | Malignant brain edema    | 0.88  | No                  | Yes            | Yes            | Homogeneous sample composition biased toward elderly population (average age 75.7)    |

Supplementary Table 2: **Static Variable Missingness.** Missingness in static variables across cohorts. All variables presented as patient counts of missing data (percentage of patients). Statistical significance of differences between cohorts tested using  $\chi^2$  test.

| Variable                                   | Massachusetts General Brigham | Boston Medical Center | p-value |
|--------------------------------------------|-------------------------------|-----------------------|---------|
| <b>Demographic Factors</b>                 |                               |                       |         |
| Age                                        | 0 (0%)                        | 0 (0%)                | 1.000   |
| Sex                                        | 0 (0%)                        | 0 (0%)                | 1.000   |
| Race                                       | 0 (0%)                        | 0 (0%)                | 1.000   |
| <b>Medical History</b>                     |                               |                       |         |
| Previous stroke                            | 0 (0%)                        | 0 (0%)                | 1.000   |
| Atrial fibrillation                        | 0 (0%)                        | 0 (0%)                | 1.000   |
| Hypertension                               | 0 (0%)                        | 0 (0%)                | 1.000   |
| <b>Stroke Characteristics at Admission</b> |                               |                       |         |
| NIHSS                                      | 46 (7.4%)                     | 0 (0%)                | 0.056   |
| ASPECTS                                    | 0 (0%)                        | 0 (0%)                | 1.000   |
| Stroke side                                | 0 (0%)                        | 0 (0%)                | 1.000   |
| Anterior cerebral artery involved          | 0 (0%)                        | 0 (0%)                | 1.000   |
| Vessel Occlusion                           | 0 (0%)                        | 0 (0%)                | 1.000   |
| Collateral Score                           | 207 (33.2%)                   | 28 (46.7%)            | 0.051   |
| First MLS                                  | 157 (25.2%)                   | 0 (0%)                | 0.000   |
| Cerebral Atrophy                           | 3 (0.5%)                      | 0 (0%)                | 1.000   |
| <b>Vital Signs at Admission</b>            |                               |                       |         |
| Mean arterial pressure                     | 43 (6.9%)                     | 0 (0%)                | 0.068   |
| Systolic blood pressure                    | 0 (0%)                        | 0 (0%)                | 1.000   |
| Diastolic blood pressure                   | 43 (6.9%)                     | 0 (0%)                | 0.068   |
| Heart rate                                 | 454 (72.9%)                   | 0 (0%)                | 0.000   |
| Body temperature                           | 454 (72.9%)                   | 0 (0%)                | 0.000   |
| <b>Laboratory Values at Admission</b>      |                               |                       |         |
| White blood cell count                     | 3 (0.5%)                      | 0 (0%)                | 1.000   |
| Blood glucose                              | 2 (0.3%)                      | 0 (0%)                | 1.000   |
| HbA1c                                      | 98 (15.7%)                    | 3 (5.0%)              | 0.041   |
| Osmolality                                 | 445 (71.4%)                   | 31 (51.7%)            | 0.002   |
| Creatinine                                 | 3 (0.5%)                      | 0 (0%)                | 1.000   |
| Sodium                                     | 2 (0.3%)                      | 0 (0%)                | 1.000   |
| Blood urea nitrogen                        | 3 (0.5%)                      | 0 (0%)                | 1.000   |
| <b>Treatments Administered</b>             |                               |                       |         |
| Medical Thrombolysis                       | 0 (0%)                        | 0 (0%)                | 1.000   |
| Mechanical Thrombectomy                    | 0 (0%)                        | 0 (0%)                | 1.000   |
| Decompressive Hemicraniectomy              | 0 (0%)                        | 0 (0%)                | 1.000   |
| Osmotic Therapies                          | 0 (0%)                        | 0 (0%)                | 1.000   |
| <b>Clinical Outcomes</b>                   |                               |                       |         |
| Modified Rankin Scale                      | 121 (19.4%)                   | 0 (0%)                | 0.000   |



Supplementary Table 3: **Dynamic Variable Updates.** Percent of patient-hour observations over the first week of hospitalization with an updated dynamic variable measurement in the past 8 hours.

| Variable                         | Massachusetts General Brigham | Boston Medical Center | p-value |
|----------------------------------|-------------------------------|-----------------------|---------|
| <b>Vital Signs</b>               |                               |                       |         |
| Heart rate                       | 27.3%                         | 98.0%                 | 0.000   |
| Systolic blood pressure          | 18.8%                         | 96.4%                 | 0.000   |
| Diastolic blood pressure         | 18.8%                         | 96.4%                 | 0.000   |
| Body temperature                 | 27.8%                         | 96.1%                 | 0.000   |
| <b>Laboratory Values</b>         |                               |                       |         |
| White blood cell count           | 45.5%                         | 43.3%                 | 0.657   |
| Blood glucose                    | 69.9%                         | 71.3%                 | 0.757   |
| Osmolality                       | 18.9%                         | 20.3%                 | 0.728   |
| Creatinine                       | 58.1%                         | 49.0%                 | 0.069   |
| Sodium                           | 63.9%                         | 68.1%                 | 0.368   |
| Blood urea nitrogen              | 58.1%                         | 49.1%                 | 0.072   |
| <b>Radiographic Measurements</b> |                               |                       |         |
| Midline shift                    | 25.6%                         | 27.5%                 | 0.670   |
| Pineal gland shift               | 25.6%                         | 27.1%                 | 0.736   |

Supplementary Table 4: **Dynamic Variable Frequency.** Average time delay between updated measurements in dynamic variables within the first week of hospitalization across cohorts. All variables presented as mean hours (SD). Statistical significance of differences between cohorts tested using Mann-Whitney U test.

| Variable                         | Massachusetts General Brigham | Boston Medical Center | p-value |
|----------------------------------|-------------------------------|-----------------------|---------|
| <b>Vital Signs</b>               |                               |                       |         |
| Heart rate                       | 6.1 (4.1)                     | 3.1 (4.2)             | 0.000   |
| Systolic blood pressure          | 7.1 (4.3)                     | 2.6 (3.8)             | 0.000   |
| Diastolic blood pressure         | 7.6 (4.7)                     | 3.1 (3.9)             | 0.000   |
| Body temperature                 | 8.8 (6.5)                     | 5.9 (7.0)             | 0.000   |
| <b>Laboratory Values</b>         |                               |                       |         |
| White blood cell count           | 8.6 (7.2)                     | 13.8 (17.8)           | 0.003   |
| Blood glucose                    | 6.0 (5.3)                     | 6.8 (7.6)             | 0.652   |
| Osmolality                       | 11.8 (8.2)                    | 21.1 (23.5)           | 0.008   |
| Creatinine                       | 7.8 (6.3)                     | 12.3 (12.8)           | 0.002   |
| Sodium                           | 7.7 (6.2)                     | 10.2 (11.6)           | 0.286   |
| Blood urea nitrogen              | 8.2 (6.3)                     | 13.2 (15.6)           | 0.003   |
| <b>Radiographic Measurements</b> |                               |                       |         |
| Midline shift                    | 11.3 (9.1)                    | 18.8 (22.7)           | 0.003   |
| Pineal gland shift               | 11.6 (9.1)                    | 18.9 (22.4)           | 0.008   |

Supplementary Table 5: **Edema Severity.** Maximum MLS class reached by patients across cohorts and prediction tasks.

| Data set                                     | Task    | Maximum MLS class |       |       |      |
|----------------------------------------------|---------|-------------------|-------|-------|------|
|                                              |         | 0mm               | 0-3mm | 3-8mm | >8mm |
| Mass General Brigham<br>(derivation cohort)  | 8-hour  | 162               | 100   | 216   | 145  |
|                                              | 24-hour | 123               | 81    | 204   | 125  |
| Boston Medical Center<br>(validation cohort) | 8-hour  | 10                | 10    | 17    | 23   |
|                                              | 24-hour | 9                 | 9     | 18    | 19   |

Supplementary Table 6: **Hospitalization Characteristics.** Average characteristics of patient hospitalization by initial MLS class using full 8-hour task cohorts.

| Data set                                                                                                            | Characteristic                      | Initial MLS class |             |             |      |
|---------------------------------------------------------------------------------------------------------------------|-------------------------------------|-------------------|-------------|-------------|------|
|                                                                                                                     |                                     | 0mm               | 0-3mm       | 3-8mm       | >8mm |
| Mass General Brigham<br>(derivation cohort)                                                                         | Number of Patients, count (%)       | 535 (85.9%)       | 48 (7.7%)   | 40 (6.4%)   | None |
|                                                                                                                     | Length of Stay (days), median (IQR) | 2.2 (4.0)         | 1.4 (3.2)   | 3.1 (4.8)   | None |
|                                                                                                                     | Hours Between Scans*, mean (SD)     | 21.6 (13.0)       | 21.5 (14.2) | 28.8 (31.6) | None |
|                                                                                                                     | Maximum MLS (mm), mean (SD)         | 3.3 (4.2)         | 4.4 (3.6)   | 7.2 (3.7)   | None |
| Boston Medical Center<br>(validation cohort)                                                                        | Number of Patients, count (%)       | 49 (81.7%)        | 9 (15.0%)   | 2 (3.3%)    | None |
|                                                                                                                     | Length of Stay (days), median (IQR) | 3.9 (4.9)         | 5.2 (3.8)   | 3.4 (2.4)   | None |
|                                                                                                                     | Hours Between Scans*, mean (SD)     | 21.8 (9.2)        | 25.4 (11.4) | 26.6 (11.8) | None |
|                                                                                                                     | Maximum MLS (mm), mean (SD)         | 5.1 (5.2)         | 7.9 (4.9)   | 10.2 (5.9)  | None |
| *Frequency of scanning calculated using first 7 days of hospitalization due to infrequent scanning in later periods |                                     |                   |             |             |      |

Supplementary Table 7: Complete list of features used by HELMET-24.

| Feature                  | Relative Importance | Description                                                          | Source                 |
|--------------------------|---------------------|----------------------------------------------------------------------|------------------------|
| LLM_24_3                 | 53.3                | LLM-assessed probability of transition to class 3 over next 24 hours | Radiology Report Texts |
| LLM_24_2                 | 46.8                | LLM-assessed probability of transition to class 2 over next 24 hours | Radiology Report Texts |
| LLM_24_1                 | 41.4                | LLM-assessed probability of transition to class 1 over next 24 hours | Radiology Report Texts |
| LLM_24_0                 | 29.1                | LLM-assessed probability of transition to class 0 over next 24 hours | Radiology Report Texts |
| LLM_36_1                 | 11.5                | LLM-assessed probability of transition to class 1 over next 36 hours | Radiology Report Texts |
| wbc1                     | 11.0                | White blood cell count at admission                                  | Patient Medical Record |
| LLM_8_0                  | 8.0                 | LLM-assessed probability of transition to class 0 over next 8 hours  | Radiology Report Texts |
| rolling_map              | 7.8                 | Maximum mean arterial pressure over past 24 hours                    | Patient Medical Record |
| LLM_8_2                  | 7.5                 | LLM-assessed probability of transition to class 2 over next 8 hours  | Radiology Report Texts |
| firstmls_time_censored   | 7.4                 | Value of first measured MLS                                          | Radiographic Images    |
| rolling_pulse            | 7.3                 | Maximum pulse over past 24 hours                                     | Patient Medical Record |
| LLM_36_0                 | 6.9                 | LLM-assessed probability of transition to class 0 over next 36 hours | Radiology Report Texts |
| mls5dt_time_censored     | 6.8                 | Time at which patient first reached MLS of 5mm or greater            | Radiographic Images    |
| temp                     | 6.7                 | Most recent body temperature                                         | Patient Medical Record |
| prev_mls                 | 6.5                 | Last measured MLS value prior to current value                       | Radiographic Images    |
| LLM_36_2                 | 6.4                 | LLM-assessed probability of transition to class 2 over next 36 hours | Radiology Report Texts |
| LLM_8_3                  | 5.9                 | LLM-assessed probability of transition to class 3 over next 8 hours  | Radiology Report Texts |
| gluc1                    | 5.7                 | Blood glucose at admission                                           | Patient Medical Record |
| hi2                      | 5.6                 | Petechial hemorrhage gaining confluence in most recent scan          | Radiographic Images    |
| rolling_size_mls         | 5.6                 | Maximum MLS value over past 24 hours                                 | Radiographic Images    |
| pulse1                   | 5.1                 | Pulse at admission                                                   | Patient Medical Record |
| size_mls                 | 4.9                 | Most recent MLS value                                                | Radiographic Images    |
| rolling_temp             | 4.8                 | Maximum body temperature over past 24 hours                          | Patient Medical Record |
| pgs2_time_censored       | 4.7                 | Value of maximum pineal gland shift of 2mm or greater so far         | Radiographic Images    |
| pgs4dt_time_censored     | 4.7                 | Time at which pineal gland shift first reached 4mm or greater        | Radiographic Images    |
| temp1                    | 4.7                 | Body temperature at admission                                        | Patient Medical Record |
| hts23_x                  | 4.5                 | Administration of hypertonic saline (concentration 23.4%)            | Patient Medical Record |
| evd                      | 4.5                 | Extraventricular drain in most recent scan                           | Radiographic Images    |
| aspects                  | 4.4                 | Most recent ASPECTS index score                                      | Radiographic Images    |
| rolling_hts3_y           | 4.1                 | Whether hypertonic saline (concentration 3%) has been administered   | Patient Medical Record |
| aspects1dt_time_censored | 4.1                 | Time of first ASPECTS index score                                    | Radiographic Images    |
| pres                     | 4.0                 | Time of admission                                                    | Patient Medical Record |
| map1                     | 4.0                 | Mean arterial pressure at admission                                  | Patient Medical Record |
| LLM_36_3                 | 4.0                 | LLM-assessed probability of transition to class 3 over next 36 hours | Radiology Report Texts |
| bun1                     | 4.0                 | Blood urea nitrogen at admission                                     | Patient Medical Record |
| wbc                      | 4.0                 | Most recent white blood cell count                                   | Patient Medical Record |
| imagetype                | 3.8                 | Categorical representation of most recent scan type                  | Radiographic Images    |
| rolling_aca_x            | 3.7                 | Whether anterior cerebral artery has been involved in past 24 hours  | Radiographic Images    |

Continued on next page

Supplementary Table 7 – continued from previous page

| Feature                   | Relative Importance | Description Source                                                      |
|---------------------------|---------------------|-------------------------------------------------------------------------|
| rolling_hsts23_y          | 3.7                 | Whether hypertonic saline (concentration 23.4%) has been administered   |
| firstmldsdt_time_censored | 3.5                 | Time of first MLS measurement greater than 0                            |
| stroke_territory          | 3.5                 | Size of affected stroke territory                                       |
| rolling_osm               | 3.5                 | Maximum osmolality value over past 24 hours                             |
| mls3dt_time_censored      | 3.5                 | Time of first MLS measurement of 3mm or greater                         |
| sbp1                      | 3.5                 | Systolic blood pressure at admission                                    |
| rolling_size_pgs          | 3.4                 | Maximum pineal gland shift over past 24 hours                           |
| rolling_gluc              | 3.3                 | Maximum blood glucose over past 24 hours                                |
| rolling_sbp               | 3.3                 | Maximum systolic blood pressure over past 24 hours                      |
| sbp                       | 3.3                 | Most recent systolic blood pressure                                     |
| age_calc                  | 3.3                 | Age                                                                     |
| cr                        | 3.3                 | Most recent creatinine value                                            |
| dbp1                      | 3.2                 | Diastolic blood pressure at admission                                   |
| rolling_dbp               | 3.2                 | Maximum diastolic blood pressure over past 24 hours                     |
| rolling_wbc               | 3.1                 | Maximum white blood cell count over past 24 hours                       |
| LLM_8_1                   | 3.1                 | LLM-assessed probability of transition to class 1 over next 8 hours     |
| aspects1_time_censored    | 3.0                 | ASPECTS score from first scan                                           |
| osm                       | 3.0                 | Most recent osmolality value                                            |
| mtdt_time_censored        | 3.0                 | Time of mechanical thrombectomy                                         |
| aca_x                     | 2.9                 | Whether anterior cerebral artery is involved in most recent scan        |
| htn                       | 2.9                 | History of hypertension                                                 |
| rolling_mannitol_y        | 2.9                 | Whether mannitol has been administered                                  |
| stroke                    | 2.9                 | Occurrence of previous stroke                                           |
| rolling_na                | 2.8                 | Maximum sodium over past 24 hours                                       |
| dbp                       | 2.8                 | Most recent diastolic blood pressure value                              |
| af                        | 2.7                 | History of atrial fibrillation                                          |
| na1                       | 2.7                 | Sodium at admission                                                     |
| mt_time_censored          | 2.7                 | Whether mechanical thrombectomy has occurred                            |
| dt                        | 2.7                 | Hours since Last Seen Well                                              |
| rolling_bun               | 2.6                 | Maximum blood urea nitrogen in past 24 hours                            |
| rolling_imagetype         | 2.6                 | Most intensive scan type in last 24 hours                               |
| rolling_aspects           | 2.6                 | Maximum ASPECTS score in past 24 hours                                  |
| bun                       | 2.6                 | Most recent blood urea nitrogen value                                   |
| nihss                     | 2.5                 | NIHSS score at admission                                                |
| sex                       | 2.5                 | Female or not                                                           |
| tpa_time_censored         | 2.5                 | Administration of TPA                                                   |
| rolling_hsts3_x           | 2.4                 | Administration of hypertonic saline (concentration 3%) in past 24 hours |
| size_pgs                  | 2.4                 | Most recent pineal gland shift measurement                              |

Continued on next page

Supplementary Table 7 – continued from previous page

| Feature                  | Relative Importance | Description                                                                | Source                 |
|--------------------------|---------------------|----------------------------------------------------------------------------|------------------------|
| hts3_x                   | 2.4                 | Administration of hypertonic saline (concentration 3%) in current hour     | Patient Medical Record |
| tpadt_time_censored      | 2.4                 | Time at which TPA was administered                                         | Patient Medical Record |
| rolling_cr               | 2.4                 | Maximum creatinine value in past 24 hours                                  | Patient Medical Record |
| rolling_osmotics_y       | 2.4                 | Whether osmotic treatment has been administered                            | Patient Medical Record |
| mls12dt_time_censored    | 2.4                 | Time at which MLS first reached 12mm or greater                            | Radiographic Images    |
| mannitol_x               | 2.3                 | Administration of mannitol in current hour                                 | Patient Medical Record |
| gluc                     | 2.3                 | Most recent blood glucose value                                            | Patient Medical Record |
| na                       | 2.3                 | Most recent sodium value                                                   | Patient Medical Record |
| rolling_hts23_x          | 2.2                 | Administration of hypertonic saline (concentration 23.4%) in past 24 hours | Patient Medical Record |
| obsTime                  | 2.2                 | Current date and time                                                      | Patient Medical Record |
| cr1                      | 2.2                 | Creatinine at admission                                                    | Patient Medical Record |
| rolling_hi1              | 2.1                 | Petechial hemorrhage in past 24 hours                                      | Radiographic Images    |
| rolling_stroke_territory | 2.0                 | Maximum size of stroke territory affected in last 24 hours                 | Radiographic Images    |
| rolling_bce_severity     | 2.0                 | Maximum basilar cistern effacement in past 24 hours                        | Radiographic Images    |
| pgs2dt_time_censored     | 1.9                 | Time at which pineal gland shift first reached 2mm or greater              | Radiographic Images    |
| rolling_hi2              | 1.9                 | Petechial hemorrhages starting to gain confluence in past 24 hours         | Radiographic Images    |
| map                      | 1.9                 | Most recent mean arterial pressure value                                   | Patient Medical Record |
| hi1                      | 1.8                 | Petechial hemorrhage present in most recent scan                           | Radiographic Images    |
| rolling_aca_y            | 1.8                 | Whether anterior cerebral artery was ever involved                         | Radiographic Images    |
| rolling_evd              | 1.6                 | Extraventricular drain in past 24 hours                                    | Radiographic Images    |
| pulse                    | 1.6                 | Most recent pulse                                                          | Patient Medical Record |
| rolling_mannitol_x       | 1.5                 | Administration of mannitol in past 24 hours                                | Patient Medical Record |

Supplementary Table 8: Complete list of features used by HELMET-8.

| Feature                  | Relative Importance | Description                                                                         | Source |
|--------------------------|---------------------|-------------------------------------------------------------------------------------|--------|
| prev_mls                 | 72.7                | Last measured MLS value prior to current value                                      |        |
| LLM_8_2                  | 48.9                | LLM-assessed probability of transition to class 2 over next 8 hours                 |        |
| size_mls                 | 47.1                | Most recent MLS measurement                                                         |        |
| LLM_8_3                  | 42.0                | LLM-assessed probability of transition to class 3 over next 8 hours                 |        |
| LLM_8_1                  | 37.4                | LLM-assessed probability of transition to class 1 over next 8 hours                 |        |
| firstmlsdt_time_censored | 14.0                | Time of first non-zero MLS measurement                                              |        |
| mls3dt_time_censored     | 13.6                | Time of first MLS measurement greater than 3mm                                      |        |
| LLM_8_0                  | 12.5                | LLM-assessed probability of transition to class 0 over next 8 hours                 |        |
| firstmls_time_censored   | 10.7                | Value of first non-zero MLS measurement                                             |        |
| pulse1                   | 9.6                 | Pulse at admission                                                                  |        |
| temp1                    | 9.4                 | Body temperature at admission                                                       |        |
| rolling_hts3_x           | 8.5                 | Whether hypertonic saline (concentration 3%) has been administered in past 24 hours |        |
| LLM_24_3                 | 8.2                 | LLM-assessed probability of transition to class 3 over next 24 hours                |        |
| LLM_24_1                 | 7.8                 | LLM-assessed probability of transition to class 1 over next 24 hours                |        |
| dbp                      | 7.5                 | Most recent diastolic blood pressure                                                |        |
| rolling_temp             | 7.1                 | Maximum body temperature in past 24 hours                                           |        |
| LLM_24_0                 | 6.9                 | LLM-assessed probability of transition to class 0 over next 24 hours                |        |
| pgs2dt_time_censored     | 6.8                 | Time of first pineal gland shift measurement greater than 2mm                       |        |
| LLM_36_3                 | 6.5                 | LLM-assessed probability of transition to class 3 over next 36 hours                |        |
| aspects1dt_time_censored | 6.3                 | Time of first ASPECTS score                                                         |        |
| pulse                    | 6.0                 | Most recent pulse                                                                   |        |
| LLM_24_2                 | 5.9                 | LLM-assessed probability of transition to class 2 over next 24 hours                |        |
| imagetype                | 5.9                 | Category of most recent scan                                                        |        |
| pres                     | 5.9                 | Time of admission                                                                   |        |
| LLM_36_0                 | 5.7                 | LLM-assessed probability of transition to class 0 over next 36 hours                |        |
| rolling_dbp              | 5.6                 | Maximum diastolic blood pressure in past 24 hours                                   |        |
| LLM_36_2                 | 5.5                 | LLM-assessed probability of transition to class 2 over next 36 hours                |        |
| rolling_imagetype        | 5.4                 | Most intense scan in past 24 hours                                                  |        |
| af                       | 5.4                 | History of atrial fibrillation                                                      |        |
| LLM_36_1                 | 5.3                 | LLM-assessed probability of transition to class 1 over next 36 hours                |        |
| mt_time_censored         | 5.3                 | Whether mechanical thrombectomy has occurred                                        |        |
| pgs4dt_time_censored     | 5.1                 | Time of first pineal gland shift measurement greater than 4mm                       |        |
| rolling_osmotics_y       | 5.1                 | Whether osmotics have been administered                                             |        |
| rolling_sbp              | 4.9                 | Maximum systolic blood pressure in past 24 hours                                    |        |
| hts23_x                  | 4.8                 | Administration of hypertonic saline (concentration 23.4%) in current hour           |        |
| tpa_time_censored        | 4.6                 | Whether TPA has been administered                                                   |        |
| rolling_aspects          | 4.6                 | Maximum ASPECTS score in past 24 hours                                              |        |
| stroke_territory         | 4.5                 | Size of affected stroke territory on most recent scan                               |        |

Continued on next page

Supplementary Table 8 – continued from previous page

| Feature                  | Relative Importance | Description                                                                            | Source |
|--------------------------|---------------------|----------------------------------------------------------------------------------------|--------|
| rolling_aca_x            | 4.4                 | Whether anterior cerebral artery has been affected in past 24 hours                    |        |
| cr1                      | 4.4                 | Creatine at admission                                                                  |        |
| wbc                      | 4.4                 | Most recent white blood cell count                                                     |        |
| rolling_hts23_x          | 4.4                 | Whether hypertonic saline (concentration 23.4%) has been administered in past 24 hours |        |
| rolling_map              | 4.3                 | Maximum mean arterial pressure in past 24 hours                                        |        |
| rolling_pulse            | 4.2                 | Maximum pulse in past 24 hours                                                         |        |
| rolling_size_pgs         | 4.1                 | Maximum pineal gland shift measurement in past 24 hours                                |        |
| rolling_size_mls         | 4.1                 | Maximum MLS measurement in past 24 hours                                               |        |
| wbc1                     | 4.1                 | White blood cell count at admission                                                    |        |
| aspects1_time_censored   | 4.1                 | ASPECTS score at admission                                                             |        |
| bun                      | 4.1                 | Most recent blood urea nitrogen value                                                  |        |
| dbp1                     | 4.1                 | Diastolic blood pressure at admission                                                  |        |
| size_pgs                 | 4.0                 | Most recent pineal gland shift measurement                                             |        |
| rolling_wbc              | 4.0                 | Maximum white blood cell count in past 24 hours                                        |        |
| mtdt_time_censored       | 4.0                 | Time of mechanical thrombectomy                                                        |        |
| cr                       | 4.0                 | Most recent creatinine value                                                           |        |
| na                       | 4.0                 | Most recent sodium value                                                               |        |
| obsTime                  | 3.9                 | Current time                                                                           |        |
| map1                     | 3.9                 | Mean arterial pressure at admission                                                    |        |
| aca_x                    | 3.9                 | Whether anterior cerebral artery was involved in most recent scan                      |        |
| rolling_stroke_territory | 3.8                 | Maximum size of affected stroke territory in past 24 hours                             |        |
| rolling_aca_y            | 3.8                 | Whether anterior cerebral artery has been involved in scans in the past 24 hours       |        |
| rolling_gluc             | 3.8                 | Maximum blood glucose in past 24 hours                                                 |        |
| gluc1                    | 3.7                 | Blood glucose at admission                                                             |        |
| temp                     | 3.7                 | Most recent body temperature                                                           |        |
| map                      | 3.7                 | Most recent mean arterial pressure                                                     |        |
| tpadt_time_censored      | 3.7                 | Time at which TPA was administered                                                     |        |
| bun1                     | 3.6                 | Blood urea nitrogen at admission                                                       |        |
| aca1                     | 3.5                 | Whether anterior cerebral artery was involved at first scan                            |        |
| rolling_mannitol_x       | 3.5                 | Whether mannitol has been administered in last 24 hours                                |        |
| nihss                    | 3.5                 | NIHSS score at admission                                                               |        |
| age_calc                 | 3.5                 | Age                                                                                    |        |
| na1                      | 3.4                 | Sodium at admission                                                                    |        |
| sbp                      | 3.4                 | Most recent systolic blood pressure                                                    |        |
| dt                       | 3.4                 | Current time                                                                           |        |
| rolling_mannitol_y       | 3.4                 | Whether mannitol has been administered at any point                                    |        |
| rolling_cr               | 3.2                 | Maximum creatinine value in past 24 hours                                              |        |
| mannitol_x               | 3.1                 | Administration of mannitol                                                             |        |

Continued on next page

Supplementary Table 8 – continued from previous page

| Feature              | Relative Importance | Description                                                           | Source |
|----------------------|---------------------|-----------------------------------------------------------------------|--------|
| sbp1                 | 3.1                 | Systolic blood pressure at admission                                  |        |
| aspects              | 3.0                 | Most recent ASPECTS score                                             |        |
| rolling_na           | 2.9                 | Maximum sodium value in past 24 hours                                 |        |
| sex                  | 2.8                 | Female or not                                                         |        |
| osm                  | 2.6                 | Most recent osmolality value                                          |        |
| gluc                 | 2.6                 | Most recent blood glucose value                                       |        |
| rolling_bce_severity | 2.5                 | Maximum basilar cistern effacement in past 24 hours                   |        |
| rolling_osm          | 2.4                 | Maximum osmolality in past 24 hours                                   |        |
| rolling_bun          | 2.4                 | Maximum blood urea nitrogen in past 24 hours                          |        |
| rolling_hts3_y       | 2.3                 | Whether hypertonic saline (concentration 3%) has been administered    |        |
| hi2                  | 2.2                 | Petechial hemorrhage on most recent scan                              |        |
| mls7_time_censored   | 2.0                 | Value of maximum MLS measurement greater than 7mm                     |        |
| mls7dt_time_censored | 1.8                 | Time of first MLS measurement greater than 7mm                        |        |
| pgs4_time_censored   | 1.8                 | Value of maximum pineal gland shift greater than 4mm                  |        |
| mls5dt_time_censored | 1.7                 | Time of first MLS measurement greater than 5mm                        |        |
| rolling_hts23_y      | 1.6                 | Whether hypertonic saline (concentration 23.4%) has been administered |        |
| hts3_x               | 1.6                 | Administration of hypertonic saline (concentration 3%)                |        |
| rolling_hi1          | 1.1                 | Petechial hemorrhage in past 24 hours                                 |        |
| rolling_hi2          | 0.1                 | Petechial hemorrhage gaining confluence in past 24 hours              |        |



Supplementary Table 9: **Algorithm Comparison.** A comparison of XGBoost and Random Forest performance on five-fold splits on the derivation dataset.

| Prediction Task | Model          | AUROC                 | AUPRC                 | Accuracy              |
|-----------------|----------------|-----------------------|-----------------------|-----------------------|
| 24 hours        | Random Forrest | 86.0%(84.51%, 87.49%) | 68.0%(64.41%, 71.59%) | 62.0%(58.32%, 65.68%) |
|                 | XGBoost        | 86.1%(85.37%, 86.83%) | 68.7%(67.87%, 69.53%) | 62.1%(60.53%, 63.67%) |
| 8 hours         | Random Forrest | 86.0%(85.42%, 86.58%) | 67.0%(65.33%, 68.67%) | 63.0%(59.14%, 66.86%) |
|                 | XGBoost        | 86.2%(85.68%, 86.72%) | 67.3%(66.84%, 67.76%) | 62.8%(61.61%, 63.99%) |

Supplementary Table 10: **Model Training Parameters.** Final hyperparameters used in training HELMET-24 and HELMET-8. Optimal hyperparameters were determined through cross-validation and bayesian optimizaiton across successive model training runs.

| Parameter                   | HELMET-24 | HELMET-8 |
|-----------------------------|-----------|----------|
| Maximum Tree Depth          | 7         | 4        |
| Minimum Child Weight        | 1         | 10       |
| Learning Rate               | 0.0972    | 0.0669   |
| Gamma                       | 1.32      | 0.0831   |
| Data Subsample              | 0.704     | 0.768    |
| Regularization Lambda       | 6.07      | 6.62     |
| Regularization Alpha        | 2.04      | 1.36     |
| No-transition Sample Weight | 0.475     | 0.563    |

Supplementary Table 11: **Complete Performance Metrics.** Comparison of performance metrics for HELMET and EDEMA models across derivation and external validation cohorts. Reported values were averaged across five cross-validation folds. The HELMET models were derived using the training set of the derivation cohort and were evaluated on the testing set of the derivation cohort and the entire external validation cohort. The EDEMA Regression Baseline models were separately trained and tested on both the derivation and external validation data. Values in parentheses reflect the 95% confidence intervals.

| Cohort                     | Metric      | Type     | 24 hours ahead       |                       | 8 hours ahead           |                       |
|----------------------------|-------------|----------|----------------------|-----------------------|-------------------------|-----------------------|
|                            |             |          | EDEMA Baseline       | HELMET-24             | EDEMA Baseline          | HELMET-8              |
| Derivation Cohort          | AUROC       | Overall  | 78.0% (71.3%, 84.7%) | 96.7% (95.2%, 98.1%)  | 80.5% (74.1%, 86.9%)    | 96.6% (95.6%, 97.7%)  |
|                            |             | Filtered | 54.7% (41.7%, 67.6%) | 94.1% (92.3%, 96.0%)  | 57.5% (46.3%, 68.7%)    | 76.2% (66.6%, 85.8%)  |
|                            | AUPRC       | Overall  | 57.6% (42.4%, 72.8%) | 87.2% (83.2%, 91.2%)  | 59.3% (44.9%, 73.6%)    | 87.5% (82.9%, 92.1%)  |
|                            |             | Filtered | 37.1% (28.6%, 45.5%) | 85.2% (78.1%, 92.2%)  | 37.3% (29.8%, 44.7%)    | 61.2% (46.9%, 75.5%)  |
|                            | Accuracy    | Overall  | 59.0% (53.5%, 64.4%) | 87.3% (84.1%, 90.4%)  | 61.6% (57.8%, 65.3%)    | 82.9% (76.2%, 89.6%)  |
|                            |             | Filtered | 25.1% (18.1%, 32.0%) | 81.2% (76.5%, 85.9%)  | 23.5% (18.1%, 28.8%)    | 46.7% (38.1%, 55.3%)  |
|                            | Sensitivity | Overall  | 37.6% (30.4%, 44.8%) | 91.2% (85.4%, 97.0%)  | 32.1% (26.2%, 37.9%)    | 57.7% (47.4%, 68.1%)  |
|                            |             | Filtered | 37.6% (30.4%, 44.8%) | 91.2% (85.4%, 97.0%)  | 32.1% (26.2%, 37.9%)    | 57.7% (47.4%, 68.1%)  |
|                            | Specificity | Overall  | 84.3% (78.0%, 90.6%) | 94.0% (88.5%, 99.5%)  | 87.6% (77.8%, 97.4%)    | 90.2% (81.1%, 99.2%)  |
|                            |             | Filtered | 86.9% (77.0%, 96.9%) | 97.8% (91.1%, 100.0%) | 85.1% (64.3%, 100.0%)   | 75.6% (9.5%, 100.0%)  |
| External Validation Cohort | AUROC       | Overall  | 51.3% (42.7%, 59.9%) | 69.7% (60.3%, 79.0%)  | 58.5% (48.5%, 68.4%)    | 92.5% (89.4%, 95.6%)  |
|                            |             | Filtered | 51.1% (40.8%, 61.4%) | 70.7% (61.1%, 80.3%)  | 58.8% (48.7%, 68.8%)    | 92.1% (88.5%, 95.7%)  |
|                            | AUPRC       | Overall  | 33.0% (19.1%, 46.9%) | 46.9% (35.6%, 58.1%)  | 38.9% (26.2%, 51.6%)    | 80.5% (69.8%, 91.3%)  |
|                            |             | Filtered | 35.3% (21.3%, 49.2%) | 48.4% (36.2%, 60.6%)  | 40.2% (27.5%, 52.9%)    | 79.8% (70.3%, 89.3%)  |
|                            | Accuracy    | Overall  | 29.2% (16.7%, 41.6%) | 48.6% (46.7%, 50.6%)  | 37.9% (5.3%, 70.5%)     | 75.3% (70.3%, 80.3%)  |
|                            |             | Filtered | 30.4% (22.5%, 38.3%) | 48.7% (45.6%, 51.8%)  | 28.9% (7.8%, 49.9%)     | 73.3% (68.0%, 78.6%)  |
|                            | Sensitivity | Overall  | 63.3% (37.3%, 89.3%) | 87.4% (80.9%, 94.0%)  | 47.9% (17.8%, 78.1%)    | 92.1% (89.4%, 94.9%)  |
|                            |             | Filtered | 63.3% (37.3%, 89.3%) | 87.4% (80.9%, 94.0%)  | 47.9% (17.8%, 78.1%)    | 92.1% (89.4%, 94.9%)  |
|                            | Specificity | Overall  | 62.3% (44.8%, 79.7%) | 80.6% (75.3%, 85.9%)  | 78.2% (52.3%, 100.0%)   | 94.1% (89.6%, 98.6%)  |
|                            |             | Filtered | 79.6% (63.8%, 95.3%) | 95.0% (91.5%, 98.5%)  | 100.0% (100.0%, 100.0%) | 99.2% (96.8%, 100.0%) |

**Supplementary Table 12: Performance by Hospitalization Period.** Comparison of AUROC performance for HELMET and EDEMA models across derivation and external validation cohorts by period of hospitalization (hours since last seen well). Periods were determined based on clinician-identified timings of peak edema severity. Values in parentheses reflect the 95% confidence intervals. We report the proportion of observations in each hospitalization period based on the HELMET-8 testing data; observation counts may vary slightly for HELMET-24 and EDEMA-8/24 testing sets due to missing data.

| Cohort                            | Hours after LSW                  | Type     | AUROC for 24-hour predictions |                      | AUROC for 8-hour predictions |                      |
|-----------------------------------|----------------------------------|----------|-------------------------------|----------------------|------------------------------|----------------------|
|                                   |                                  |          | EDEMA Baseline                | HELMET-24            | EDEMA Baseline               | HELMET-8             |
| <b>Derivation Cohort</b>          | <24hrs (18.9% of observations)   | Overall  | 64.1% (57.4%, 70.9%)          | 97.2% (95.8%, 98.6%) | 67.6% (61.7%, 73.4%)         | 90.8% (87.9%, 93.7%) |
|                                   |                                  | Filtered | 54.4% (46.3%, 62.4%)          | 94.8% (93.3%, 96.3%) | 62.5% (52.1%, 72.8%)         | 75.3% (65.8%, 84.8%) |
|                                   | 24-48hrs (28.6% of observations) | Overall  | 76.4% (69.1%, 83.8%)          | 96.7% (95.1%, 98.2%) | 78.5% (71.6%, 85.3%)         | 94.5% (92.4%, 96.7%) |
|                                   |                                  | Filtered | 57.8% (43.5%, 72.2%)          | 94.5% (92.6%, 96.4%) | 56.9% (44.2%, 69.5%)         | 71.3% (61.7%, 81.0%) |
|                                   | 48-96hrs (29.2% of observations) | Overall  | 80.6% (73.4%, 87.7%)          | 96.1% (94.1%, 98.1%) | 80.7% (75.5%, 86.0%)         | 97.8% (96.6%, 99.1%) |
|                                   |                                  | Filtered | 57.4% (41.8%, 72.9%)          | 91.5% (88.0%, 95.1%) | 56.5% (40.9%, 72.2%)         | 82.1% (67.2%, 97.0%) |
|                                   | >96hrs (23.2% of observations)   | Overall  | 81.1% (72.2%, 90.1%)          | 96.9% (94.4%, 99.3%) | 83.8% (76.5%, 91.1%)         | 98.8% (98.2%, 99.4%) |
|                                   |                                  | Filtered | 52.9% (33.0%, 72.7%)          | 93.0% (90.2%, 95.8%) | 51.2% (33.9%, 68.5%)         | 80.4% (64.8%, 95.9%) |
|                                   | <24hrs (15.4% of observations)   | Overall  | 52.8% (42.6%, 63.1%)          | 67.4% (56.3%, 78.6%) | 62.5% (53.2%, 71.8%)         | 91.9% (87.4%, 96.4%) |
|                                   |                                  | Filtered | 48.8% (27.5%, 70.0%)          | 68.4% (55.5%, 81.3%) | 64.7% (48.9%, 80.6%)         | 89.8% (85.0%, 94.7%) |
|                                   | 24-48hrs (23.9% of observations) | Overall  | 43.7% (35.5%, 51.8%)          | 68.0% (59.6%, 76.4%) | 54.9% (38.8%, 70.9%)         | 92.1% (88.7%, 95.6%) |
|                                   |                                  | Filtered | 44.4% (32.2%, 56.5%)          | 67.6% (58.6%, 76.6%) | 55.5% (32.8%, 78.3%)         | 90.4% (85.5%, 95.2%) |
| <b>External Validation Cohort</b> | 48-96hrs (27.7% of observations) | Overall  | 53.9% (38.9%, 68.9%)          | 71.3% (60.9%, 81.6%) | 53.0% (34.6%, 71.3%)         | 94.6% (91.3%, 97.9%) |
|                                   |                                  | Filtered | 55.5% (37.7%, 73.3%)          | 72.0% (62.7%, 81.3%) | 57.8% (26.2%, 89.4%)         | 94.7% (91.2%, 98.2%) |
|                                   | >96hrs (32.4% of observations)   | Overall  | 44.7% (26.4%, 63.1%)          | 71.7% (60.6%, 82.9%) | 65.1% (50.5%, 79.7%)         | 91.3% (87.7%, 95.0%) |
|                                   |                                  | Filtered | 49.0% (37.2%, 60.7%)          | 73.8% (62.2%, 85.4%) | 59.5% (31.7%, 87.2%)         | 91.5% (86.9%, 96.1%) |

**Supplementary Table 13: Performance by Insurance Status.** Comparison of AUROC performance for HELMET and EDEMA models by patient insurance status. Values in parentheses reflect the 95% confidence intervals. We report the number of patients in each insurance type subset calculated based on HELMET-8 testing data; patient counts may vary slightly for HELMET-24 and EDEMA-8/24 testing sets due to missing data. NA indicates that the metric could not be computed due to an insufficient number of observations in the data subset.

| Cohort                            | Insurance Type           | Metric Type | AUROC for 24-hour predictions |                       | AUROC for 8-hour predictions |                       |
|-----------------------------------|--------------------------|-------------|-------------------------------|-----------------------|------------------------------|-----------------------|
|                                   |                          |             | EDEMA Baseline                | HELMET-24             | EDEMA Baseline               | HELMET-8              |
| <b>Derivation Cohort</b>          | Medicare/Private (n=381) | Overall     | 78.5% (71.5%, 85.5%)          | 96.3% (94.6%, 98.0%)  | 80.9% (74.2%, 87.5%)         | 96.7% (96.8%, 97.6%)  |
|                                   |                          | Filtered    | 55.2% (42.7%, 67.8%)          | 93.3% (91.3%, 95.3%)  | 58.6% (48.0%, 69.4%)         | 75.7% (68.3%, 83.1%)  |
|                                   | Medicaid (n=124)         | Overall     | 77.0% (69.7%, 84.4%)          | 97.5% (95.9%, 99.1%)  | 78.6% (71.6%, 85.6%)         | 96.2% (94.5%, 97.9%)  |
|                                   |                          | Filtered    | 51.1% (35.2%, 67.0%)          | 94.7% (90.6%, 98.8%)  | 52.7% (37.1%, 68.2%)         | 75.6% (56.5%, 97.9%)  |
|                                   | Uninsured (n=20)         | Overall     | 86.5% (74.1%, 98.9%)          | 98.7% (96.7%, 100.0%) | 58.1% (44.1%, 72.2%)         | 78.3% (76.3%, 80.2%)  |
|                                   |                          | Filtered    | 50.3% (31.0%, 69.6%)          | 74.8% (70.2%, 79.4%)  | NA                           | NA                    |
| <b>External Validation Cohort</b> | Medicare/Private (n=25)  | Overall     | 45.2% (32.0%, 58.4%)          | 66.3% (56.3%, 76.4%)  | 54.7% (42.0%, 67.3%)         | 92.5% (89.2%, 95.8%)  |
|                                   |                          | Filtered    | 41.8% (20.5%, 63.2%)          | 65.9% (56.1%, 75.8%)  | 55.1% (34.0%, 76.2%)         | 91.9% (88.3%, 95.4%)  |
|                                   | Medicaid (n=27)          | Overall     | 57.1% (46.2%, 68.0%)          | 71.0% (61.5%, 80.5%)  | 61.1% (50.2%, 72.0%)         | 92.5% (89.1%, 95.9%)  |
|                                   |                          | Filtered    | 55.6% (45.0%, 66.2%)          | 73.2% (63.6%, 82.8%)  | 54.9% (39.4%, 70.5%)         | 92.4% (88.4%, 96.4%)  |
|                                   | Uninsured (n=3)          | Overall     | NA                            | 80.4% (68.6%, 92.2%)  | NA                           | 92.7% (84.7%, 100.0%) |
|                                   |                          | Filtered    | NA                            | 70.7% (63.7%, 77.6%)  | NA                           | 90.2% (82.8%, 97.6%)  |

Supplementary Table 14: **Binary Task Performance.** Comparison of HELMET and EDEMA models for simplified binary classification task at MLS threshold of 5mm. All values shown as mean (SD) of 5-fold cross-validation testing. HELMET models were trained on derivation cohort data and evaluated on both cohorts, while EDEMA models were trained and evaluated on each cohort independently.

| Cohort                     | Metric   | Type     | 24 hours ahead |               | 8 hours ahead |              |
|----------------------------|----------|----------|----------------|---------------|---------------|--------------|
|                            |          |          | EDEMA          | HELMET-24     | EDEMA         | HELMET-8     |
| Derivation Cohort          | AUROC    | Overall  | 85.6% (3.1%)   | 88.4% (2.2%)  | 87.0% (3.9%)  | 89.1% (1.9%) |
|                            |          | Filtered | 4.5% (3.5%)    | 61.7% (13.4%) | 0.1% (0.3%)   | 32.6% (8.0%) |
|                            | AUPRC    | Overall  | 85.2% (3.0%)   | 87.9% (2.1%)  | 87.8% (3.2%)  | 89.3% (2.2%) |
|                            |          | Filtered | 60.0% (12.1%)  | 76.4% (5.9%)  | 53.6% (8.9%)  | 64.0% (8.5%) |
|                            | Accuracy | Overall  | 79.0% (4.3%)   | 80.4% (2.2%)  | 84.0% (3.7%)  | 84.5% (2.4%) |
|                            |          | Filtered | 27.0% (9.2%)   | 49.6% (17.9%) | 20.6% (12.6%) | 54.5% (8.7%) |
| External Validation Cohort | AUROC    | Overall  | 63.5% (32.6%)  | 91.0% (0.5%)  | 75.7% (38.1%) | 89.7% (0.7%) |
|                            |          | Filtered | 0.8% (1.6%)    | 55.6% (10.9%) | 1.7% (3.3%)   | 26.0% (7.5%) |
|                            | AUPRC    | Overall  | 86.0% (10.3%)  | 91.1% (0.7%)  | 96.0% (4.7%)  | 90.0% (0.7%) |
|                            |          | Filtered | 64.4% (19.2%)  | 69.4% (5.5%)  | 80.2% (24.3%) | 60.4% (4.5%) |
|                            | Accuracy | Overall  | 76.2% (12.1%)  | 83.7% (1.3%)  | 89.2% (7.0%)  | 83.7% (0.6%) |
|                            |          | Filtered | 15.1% (14.8%)  | 46.1% (15.9%) | 10.6% (13.7%) | 52.7% (8.5%) |
